# Supplementary material for: Centrosymmetric RbSnF2NO3vs. noncentrosymmetric Rb2SbF3(NO3)2
Source: Royal Society of Chemistry journal article supplement (doi:10.1039/d1qi00395j), 2021-01-01
Supplement: d1qi00395j1.pdf [file d1qi00395j1.pdf]

## Supplementary Information

### **Centrosymmetric $\text{RbSnF}_2\text{NO}_3$ vs. Noncentrosymmetric $\text{Rb}_2\text{SbF}_3(\text{NO}_3)_2$**

Lei Wang,<sup>†</sup> Hongmei Wang,<sup>†</sup> Die Zhang,<sup>†</sup> Daojiang Gao,<sup>†</sup> Jian Bi,<sup>†</sup> Ling Huang,<sup>\*†</sup>  
and Guohong Zou<sup>\*‡</sup>

<sup>†</sup> College of Chemistry and Materials Science, Sichuan Normal University, Chengdu,  
610068, P. R. China.

<sup>‡</sup> College of Chemistry, Sichuan University, Chengdu, 610064, P. R. China.

E-mail: huangl026@sina.com; zough@scu.edu.cn

## Table of contents

| Sections    | Titles                                                                                                                                                                                                                                                                                                                        | Pages |
|-------------|-------------------------------------------------------------------------------------------------------------------------------------------------------------------------------------------------------------------------------------------------------------------------------------------------------------------------------|-------|
| Sections S1 | Materials and Methods (Instrumentations and Computational Details)                                                                                                                                                                                                                                                            | S3    |
| Table S1    | Fractional atomic coordinates and isotropic or equivalent isotropic displacement parameters ( $\text{\AA}^2$ ) for $\text{RbSnF}_2\text{NO}_3$ .                                                                                                                                                                              | S5    |
| Table S2    | Fractional atomic coordinates and isotropic or equivalent isotropic displacement parameters ( $\text{\AA}^2$ ) for $\text{Rb}_2\text{SbF}_3(\text{NO}_3)_2$ .                                                                                                                                                                 | S6    |
| Table S3    | Selected Bond lengths ( $\text{\AA}$ ) and angles (deg) for $\text{RbSnF}_2\text{NO}_3$ .                                                                                                                                                                                                                                     | S7    |
| Table S4    | Selected Bond lengths ( $\text{\AA}$ ) and angles (deg) for $\text{Rb}_2\text{SbF}_3(\text{NO}_3)_2$ .                                                                                                                                                                                                                        | S8    |
| Table S5    | Calculation of dipole moment for $\text{NO}_3$ , $\text{RbO}_6\text{F}_5$ , $\text{RbO}_6\text{F}_4$ , $\text{RbO}_7\text{F}_4$ , $\text{RbO}_8\text{F}_3$ , $\text{SbO}_2\text{F}_3$ , $\text{SbO}_3\text{F}_3$ polyhedra and net dipole moment for a unit cell in $\text{Rb}_2\text{SbF}_3(\text{NO}_3)_2$ ( $D =$ Debyes). | S9    |
| Fig. S1     | TGA curves of (a) $\text{RbSnF}_2\text{NO}_3$ and (b) $\text{Rb}_2\text{SbF}_3(\text{NO}_3)_2$ under $\text{N}_2$ atmosphere.                                                                                                                                                                                                 | S10   |
| Fig. S2     | XRD patterns of the residues of TGA for (a) $\text{RbSnF}_2\text{NO}_3$ and (b) $\text{Rb}_2\text{SbF}_3(\text{NO}_3)_2$ .                                                                                                                                                                                                    | S10   |
| Fig. S3     | The IR spectra of (a) $\text{RbSnF}_2\text{NO}_3$ and (b) $\text{Rb}_2\text{SbF}_3(\text{NO}_3)_2$ .                                                                                                                                                                                                                          | S10   |
| Fig. S4     | Calculated band structures of (a) $\text{RbSnF}_2\text{NO}_3$ and (b) $\text{Rb}_2\text{SbF}_3(\text{NO}_3)_2$ .                                                                                                                                                                                                              | S11   |
| Fig. S5     | The theoretical calculations of $\text{RbSnF}_2\text{NO}_3$ .                                                                                                                                                                                                                                                                 | S11   |
| References  |                                                                                                                                                                                                                                                                                                                               | S12   |

## Section S1. Materials and Methods

**Instruments** The diffraction data acquisition of compounds  $\text{RbSnF}_2\text{NO}_3$  and  $\text{Rb}_2\text{SbF}_3(\text{NO}_3)_2$  were implemented by graphite-monochromated Mo  $K\alpha$  radiation ( $\lambda=0.71073 \text{ \AA}$ ) integrating with the SAINT program on a Bruker D8 Venture detector at a temperature of 150(2) K. SHELX-2014 program was applied to establish the crystal structures by direct method, and structures were further refined on  $F^2$  through the full-matrix least-squares method.<sup>1</sup> The program PLATON was used to examine possible additional symmetry and no higher symmetry could be found.<sup>2</sup> One possession disorder oxygen atom exists in  $\text{Rb}_2\text{SbF}_3(\text{NO}_3)_2$ , which is common for the single crystals. The crystallographic parameters as well as refinement information for two title compounds were given in table 1. The other structural data including the atomic coordinates, the selected bond distances ( $\text{\AA}$ ) and angles (deg.) were given in Tables S1-S4. The powder X-ray diffraction patterns to confirm the purity of  $\text{Rb}_2\text{SbF}_3(\text{NO}_3)_2$  and  $\text{RbSnF}_2\text{NO}_3$  powder samples were acquired on an automated Smart lab diffractometer equipped with Cu- $K\alpha$  radiation ( $\lambda=1.540598 \text{ \AA}$ ). The measuring parameters are set as: angular ranging from  $5^\circ$  to  $70^\circ$  ( $2\theta$ ) with a fixed counting time of 0.2 s and a step size of  $0.08^\circ$  at room temperature. The IR transmission of title compounds were carried out at room temperature in the  $400\text{-}4000 \text{ cm}^{-1}$  wavenumber range on a Vertex 70 Fourier transform infrared (FT-IR) spectrometer. KBr was used as background and the powdery specimens were equally mixed with dehydrated KBr and ground into fine powder with a mass proportion of 1:100, and then prepared samples were put into transparent slices for the measurements. The thermal behaviors of the ground polycrystalline samples were conducted with a NETZSCH SET-449C instrument. Approximate 14-17 mg of crystal powders were enclosed into  $\text{Al}_2\text{O}_3$  crucibles and heated in a temperature range of  $30\text{-}800 \text{ }^\circ\text{C}$  with the heating rate of  $10 \text{ }^\circ\text{C}/\text{min}$  under a constant flow of nitrogen gas. A UV-2600, Shimadzu spectrophotometer equipped with an integrating sphere at  $185\text{-}800 \text{ nm}$  was used to test optical diffuse-reflectance spectra, which can determine the cut-off edge of the title compounds. The reflectance spectra were carried out at ambient temperature using dried  $\text{BaSO}_4$  plate as a 100% reference comparison standard. The reflection spectra were converted into absorption spectra through the Kubelka-Munk function  $a/S = (1-R)^2/2R$ , in this equation,  $a$  is the absorption coefficient,  $S$  stands for the scattering coefficient that is essentially wavelength-independent when the particle size is larger than  $5 \text{ }\mu\text{m}$ , and  $R$  is the

reflectance. The powder SHG effects of the compound  $\text{Rb}_2\text{SbF}_3(\text{NO}_3)_2$  were performed by employing the method of Kurtz-Perry under a 1064 nm laser, which were radiated by a Q-switched Nd:YAG laser at ambient temperature.<sup>3</sup> Since the powder SHG effect is definitely related to particle size, the samples of  $\text{Rb}_2\text{SbF}_3(\text{NO}_3)_2$  and a reference of  $\text{KH}_2\text{PO}_4$  (KDP) were ground, then sieved into the following six discrete particle size ranges: 25-45, 45-58, 58-75, 75-106, 106-150, 150-212  $\mu\text{m}$ , which were loaded between glass slides and then pressed into respective sample rubber rings.  $\text{Rb}_2\text{SbF}_3(\text{NO}_3)_2$  and KDP powders were sieved into the same particle size to assume the SHG effect. A photomultiplier tube was used to collect the signal of the frequency-doubled output emitted from the microcrystalline samples. The first-principles calculations for  $\text{Rb}_2\text{SbF}_3(\text{NO}_3)_2$  and  $\text{RbSnF}_2\text{NO}_3$  crystals were based on their single crystal structure data. The electronic structures, optical properties and density of states (DOS) were obtained by the plane-wave pseudopotential method implemented in the CASTEP package on the basis of the density functional theory (DFT).<sup>4</sup> Meanwhile the Perdew-Burke-Brnzerhof (PBE) functional was chosen to treat the exchange-correlation potential within the generalized gradient approximation (GGA).<sup>5</sup> The cutoff energy for plane wave functions were set as 850 eV for both compounds and the numerical integration of the Brillouin zones were performed using  $3\times 5\times 3$  and  $1\times 3\times 3$  Monkhorst-Pack k-point for  $\text{Rb}_2\text{SbF}_3(\text{NO}_3)_2$  and  $\text{RbSnF}_2\text{NO}_3$ , respectively. The employed convergence benchmark was  $1.0\times 10^{-6}$  eV/atom. The connections between the valence electrons and the ionic cores were demonstrated using optimized norm-conserving pseudopotentials in Kleinman–Bylander form.<sup>6</sup>

**Table S1.** Fractional atomic coordinates and isotropic or equivalent isotropic displacement parameters ( $\text{\AA}^2$ ) for  $\text{RbSnF}_2\text{NO}_3$ .

| atom | <i>x</i>      | <i>y</i>    | <i>z</i>    | U <sub>eq</sub> ( $\text{\AA}^2$ ) | BVS    |
|------|---------------|-------------|-------------|------------------------------------|--------|
| Sn1  | 0.535133 (19) | 0.5         | 0.28349 (4) | 0.02474 (11)                       | 1.9907 |
| Rb1  | 0.81330 (3)   | 0.5         | 0.31182 (6) | 0.02688 (13)                       | 1.2153 |
| F1   | 0.66970 (16)  | 0.5         | 0.4958 (4)  | 0.0284 (5)                         | 1.1036 |
| F2   | 0.5           | 0.7344 (4)  | 0.5         | 0.0279 (5)                         | 1.1645 |
| O1   | 0.64698 (15)  | -0.2007 (4) | 0.0576 (3)  | 0.0326 (5)                         | 1.9762 |
| O2   | 0.5839 (2)    | 0.0         | 0.2427 (5)  | 0.0321 (7)                         | 1.9151 |
| N1   | 0.6261 (2)    | 0.0         | 0.1176 (5)  | 0.0244 (7)                         | 4.8768 |

**Table S2.** Fractional atomic coordinates and isotropic or equivalent isotropic displacement parameters ( $\text{\AA}^2$ ) for  $\text{Rb}_2\text{SbF}_3(\text{NO}_3)_2$ .

| atom | <i>x</i>   | <i>y</i>   | <i>z</i>   | Ueq ( $\text{\AA}^2$ ) | BVS   |
|------|------------|------------|------------|------------------------|-------|
| Sb1  | 0.6116 (4) | 0.7624 (4) | 0.2975 (3) | 0.0290 (9)             | 3.023 |
| Sb2  | 0.7810 (3) | 0.4707 (4) | 0.8247 (3) | 0.0264 (8)             | 2.911 |
| Rb1  | 0.3555 (6) | 0.7084 (6) | 0.5102 (4) | 0.0323 (12)            | 1.298 |
| Rb2  | 0.6303 (6) | 1.1788 (7) | 0.0681 (4) | 0.0347 (13)            | 1.185 |
| Rb3  | 1.0507 (5) | 0.4555 (7) | 0.6505 (4) | 0.0302 (11)            | 1.220 |
| Rb4  | 1.0574 (5) | 0.4659 (7) | 1.1318 (4) | 0.0313 (11)            | 1.171 |
| F1   | 0.825 (3)  | 0.291 (4)  | 0.717 (2)  | 0.036 (7)              | 1.096 |
| F2   | 0.818 (3)  | 0.281 (4)  | 0.944 (3)  | 0.035 (7)              | 1.149 |
| F3   | 0.957 (3)  | 0.522 (4)  | 0.870 (3)  | 0.035 (7)              | 1.140 |
| F4   | 0.478 (4)  | 0.824 (5)  | 0.158 (3)  | 0.046 (9)              | 1.068 |
| F5   | 0.510 (3)  | 0.875 (4)  | 0.388 (3)  | 0.040 (8)              | 1.218 |
| F6   | 0.674 (3)  | 1.007 (4)  | 0.292 (2)  | 0.033 (7)              | 1.283 |
| N1   | 1.117 (6)  | -0.087 (7) | 0.659 (5)  | 0.045 (11)             | 4.931 |
| N2   | 0.742 (5)  | 0.683 (6)  | 1.055 (4)  | 0.034 (9)              | 5.162 |
| N3   | 0.766 (5)  | 0.713 (6)  | 0.573 (4)  | 0.034 (9)              | 5.059 |
| N4   | 0.417 (6)  | 0.434 (8)  | 0.233 (5)  | 0.049 (12)             | 5.727 |
| O1   | 1.126 (5)  | -0.174 (6) | 0.571 (4)  | 0.045 (11)             | 2.151 |
| O2   | 1.142 (5)  | -0.164 (6) | 0.762 (4)  | 0.046 (10)             | 1.859 |
| O3   | 1.078 (5)  | 0.069 (6)  | 0.648 (5)  | 0.064 (14)             | 1.986 |
| O4   | 0.832 (4)  | 0.664 (5)  | 1.008 (3)  | 0.034 (9)              | 2.079 |
| O5   | 0.654 (4)  | 0.580 (5)  | 1.030 (4)  | 0.040 (9)              | 2.011 |
| O6   | 0.746 (4)  | 0.814 (5)  | 1.120 (4)  | 0.041 (10)             | 2.080 |
| O7   | 0.676 (4)  | 0.610 (5)  | 0.544 (4)  | 0.041 (10)             | 1.833 |
| O8   | 0.776 (4)  | 0.841 (5)  | 0.503 (3)  | 0.038 (10)             | 1.943 |
| O9   | 0.846 (4)  | 0.697 (5)  | 0.666 (3)  | 0.034 (8)              | 2.226 |
| O10  | 0.439 (6)  | 0.530 (8)  | 0.317 (5)  | 0.079 (14)             | 2.341 |
| O11  | 0.320 (7)  | 0.388 (9)  | 0.175 (7)  | 0.096 (18)             | 2.255 |
| O12  | 0.520 (12) | 0.362 (14) | 0.239 (10) | 0.071 (19)             | 1.968 |

**Table S3.** Selected Bond lengths (Å) and angles (deg) for RbSnF<sub>2</sub>NO<sub>3</sub>.

|                                          |             |                                           |             |
|------------------------------------------|-------------|-------------------------------------------|-------------|
| Sn1—F1                                   | 2.027 (2)   | Rb1—O2 <sup>ii</sup>                      | 2.967 (3)   |
| Sn1—F2                                   | 2.2001 (14) | Rb1—O1 <sup>vi</sup>                      | 3.092 (2)   |
| Sn1—F2 <sup>i</sup>                      | 2.2001 (14) | Rb1—O1 <sup>vii</sup>                     | 2.964 (2)   |
| Sn1—O2                                   | 2.8416 (1)  | Rb1—O1 <sup>viii</sup>                    | 3.092 (2)   |
| Rb1—F1 <sup>iii</sup>                    | 2.9960 (11) | Rb1—O1 <sup>ix</sup>                      | 2.964 (2)   |
| Rb1—F2 <sup>iv</sup>                     | 2.9883 (12) | O2—N1                                     | 1.266 (5)   |
| O1—N1 <sup>vii</sup>                     | 1.246 (3)   | F2—Sn1—F1                                 | 84.74 (6)   |
| F2 <sup>i</sup> —Sn1—F1                  | 84.74 (6)   | O1 <sup>viii</sup> —Rb1—F2 <sup>iv</sup>  | 76.73 (4)   |
| F2 <sup>i</sup> —Sn1—F2                  | 70.32 (10)  | O1 <sup>vii</sup> —Rb1—F2 <sup>v</sup>    | 116.77 (6)  |
| F1 <sup>ii</sup> —Rb1—F1                 | 75.37 (5)   | O1 <sup>vi</sup> —Rb1—F2 <sup>iv</sup>    | 96.17 (4)   |
| F1 <sup>ii</sup> —Rb1—F1 <sup>iii</sup>  | 128.81 (8)  | O1 <sup>vi</sup> —Rb1—F2 <sup>v</sup>     | 76.73 (4)   |
| F2 <sup>iv</sup> —Rb1—F1 <sup>iii</sup>  | 108.68 (6)  | O1 <sup>viii</sup> —Rb1—O2 <sup>ii</sup>  | 135.91 (7)  |
| F2 <sup>v</sup> —Rb1—F1 <sup>iii</sup>   | 56.91 (6)   | O1 <sup>vii</sup> —Rb1—O2 <sup>ii</sup>   | 129.85 (6)  |
| F2 <sup>iv</sup> —Rb1—F2 <sup>v</sup>    | 57.40 (8)   | O1 <sup>vii</sup> —Rb1—O1 <sup>ix</sup>   | 66.15 (9)   |
| O2 <sup>ii</sup> —Rb1—F1 <sup>ii</sup>   | 65.79 (4)   | O1 <sup>vii</sup> —Rb1—O1 <sup>vi</sup>   | 70.90 (6)   |
| O2 <sup>ii</sup> —Rb1—F1 <sup>iii</sup>  | 65.79 (4)   | O1 <sup>viii</sup> —Rb1—O1 <sup>ix</sup>  | 70.90 (6)   |
| O2 <sup>ii</sup> —Rb1—F1                 | 72.57 (7)   | Rb1—F1—Sn1                                | 111.44 (10) |
| O2 <sup>ii</sup> —Rb1—F2 <sup>iv</sup>   | 59.25 (5)   | Rb1 <sup>iii</sup> —F1—Sn1                | 103.53 (5)  |
| O1 <sup>ix</sup> —Rb1—F1 <sup>ii</sup>   | 72.37 (6)   | Rb1 <sup>ii</sup> —F1—Rb1                 | 104.63 (5)  |
| O1 <sup>vii</sup> —Rb1—F1 <sup>iii</sup> | 72.37 (6)   | Sn1 <sup>x</sup> —F2—Sn1                  | 109.68 (10) |
| O1 <sup>vi</sup> —Rb1—F1 <sup>iii</sup>  | 93.43 (6)   | Rb1 <sup>xi</sup> —F2—Sn1 <sup>x</sup>    | 99.432 (9)  |
| O1 <sup>vii</sup> —Rb1—F1 <sup>ii</sup>  | 132.97 (6)  | Rb1 <sup>ii</sup> —F2—Sn1                 | 99.432 (9)  |
| O1 <sup>vi</sup> —Rb1—F1 <sup>ii</sup>   | 133.83 (6)  | Rb1 <sup>xi</sup> —F2—Sn1                 | 112.905 (9) |
| O1 <sup>viii</sup> —Rb1—F1 <sup>ii</sup> | 93.43 (6)   | Rb1 <sup>ii</sup> —F2—Rb1 <sup>xi</sup>   | 122.60 (8)  |
| O1 <sup>ix</sup> —Rb1—F1 <sup>iii</sup>  | 132.97 (6)  | N1—O2—Rb1 <sup>iii</sup>                  | 123.4 (2)   |
| O1 <sup>vi</sup> —Rb1—F1                 | 142.04 (6)  | N1 <sup>vii</sup> —O1—Rb1 <sup>viii</sup> | 97.79 (18)  |
| O1 <sup>vii</sup> —Rb1—F1                | 71.15 (6)   | O1 <sup>vii</sup> —N1—O2                  | 119.53 (16) |
| O1 <sup>ix</sup> —Rb1—F2 <sup>v</sup>    | 167.04 (5)  | O1—N1—O2                                  | 119.53 (16) |
| O1 <sup>ix</sup> —Rb1—F2 <sup>iv</sup>   | 116.77 (6)  | O1—N1—O1 <sup>vii</sup>                   | 120.9 (3)   |

Symmetry codes: (i)  $-x+1, -y+1, -z+1$ ; (ii)  $-x+3/2, y+1/2, -z+1$ ; (iii)  $-x+3/2, y-1/2, -z+1$ ; (iv)  $-x+3/2, -y+3/2, -z+1$ ; (v)  $x+1/2, y-1/2, z$ ; (vi)  $x, y+1, z$ ; (vii)  $-x+3/2, -y+1/2, -z$ ; (viii)  $x, -y, z$ ; (ix)  $-x+3/2, y+1/2, -z$ ; (x)  $-x+1, y, -z+1$ ; (xi)  $x-1/2, y+1/2, z$ .

**Table S4.** Selected Bond lengths (Å) and angles (deg) for Rb<sub>2</sub>SbF<sub>3</sub>(NO<sub>3</sub>)<sub>2</sub>.

|                                           |             |                                         |            |
|-------------------------------------------|-------------|-----------------------------------------|------------|
| Sb2—F3                                    | 1.93 (3)    | Rb2—F2 <sup>xii</sup>                   | 2.92 (3)   |
| Sb2—F2                                    | 1.94 (3)    | Rb2—O12 <sup>viii</sup>                 | 2.92 (11)  |
| Sb2—F1                                    | 1.97 (3)    | Rb2—O6 <sup>xiii</sup>                  | 2.99 (4)   |
| Sb2—O4                                    | 2.50 (4)    | Rb2—O2 <sup>xiv</sup>                   | 3.01 (5)   |
| Sb1—F5                                    | 1.92 (3)    | F2—Rb2 <sup>iii</sup>                   | 2.92 (3)   |
| Sb1—F4                                    | 1.94 (3)    | F2—Rb4 <sup>ii</sup>                    | 2.96 (3)   |
| Sb1—F6                                    | 1.95 (3)    | F3—Rb4 <sup>i</sup>                     | 3.30 (3)   |
| Rb3—O3                                    | 2.88 (4)    | O9—Rb4 <sup>i</sup>                     | 3.05 (4)   |
| Rb3—O9                                    | 2.94 (4)    | O4—N2                                   | 1.26 (6)   |
| Rb3—O1 <sup>v</sup>                       | 2.95 (4)    | O4—Rb4 <sup>i</sup>                     | 3.19 (4)   |
| Rb3—O2 <sup>viii</sup>                    | 3.16 (5)    | O1—N1                                   | 1.23 (7)   |
| Rb3—N1 <sup>viii</sup>                    | 3.47 (5)    | O1—Rb3 <sup>vii</sup>                   | 2.95 (4)   |
| Rb4—O11 <sup>ix</sup>                     | 2.89 (7)    | O8—N3                                   | 1.27 (5)   |
| Rb4—F2 <sup>i</sup>                       | 2.96 (3)    | O8—Rb1 <sup>vi</sup>                    | 3.07 (4)   |
| Rb4—O2 <sup>i</sup>                       | 2.96 (5)    | O2—N1                                   | 1.29 (7)   |
| Rb4—F3 <sup>ii</sup>                      | 3.30 (3)    | N4—O11                                  | 1.17 (8)   |
| Rb4—O3 <sup>i</sup>                       | 3.36 (6)    | N4—O10                                  | 1.18 (7)   |
| Rb4—N1 <sup>i</sup>                       | 3.49 (6)    | N4—O12                                  | 1.24 (12)  |
| Rb1—F5                                    | 2.78 (3)    | N1—O3                                   | 1.23 (7)   |
| Rb1—F6 <sup>iv</sup>                      | 2.82 (3)    | O3—Rb4 <sup>ii</sup>                    | 3.36 (6)   |
| Rb1—F1 <sup>vi</sup>                      | 2.93 (3)    | O3—Rb3 <sup>vii</sup>                   | 3.48 (6)   |
| Rb1—Sb1 <sup>iv</sup>                     | 3.952 (6)   | F1 <sup>vi</sup> —Rb1—Sb1 <sup>iv</sup> | 128.5 (6)  |
| F3—Sb2—F2                                 | 86.2 (13)   | F5 <sup>iv</sup> —Rb1—Sb1 <sup>iv</sup> | 27.8 (7)   |
| F3—Sb2—F1                                 | 84.8 (14)   | O7—Rb1—Sb1 <sup>iv</sup>                | 79.7 (6)   |
| F2—Sb2—F1                                 | 84.9 (13)   | F4 <sup>xi</sup> —Rb2—F6                | 164.8 (11) |
| F2—Sb2—Rb3                                | 106.5 (10)  | F4 <sup>xi</sup> —Rb2—F2 <sup>xii</sup> | 68.5 (10)  |
| Rb2 <sup>iii</sup> —Sb2—Rb1 <sup>iv</sup> | 105.17 (13) | O9—N3—O8                                | 119 (5)    |
| F5—Sb1—F4                                 | 85.6 (15)   | O7—N3—O8                                | 119 (4)    |
| F5—Sb1—F6                                 | 82.8 (14)   | F4—Sb1—Rb3 <sup>v</sup>                 | 122.4 (12) |
| F4—Sb1—F6                                 | 87.4 (14)   | O3—Rb3—O2 <sup>viii</sup>               | 150.3 (14) |

Symmetry codes: (i)  $-x+2, y+1/2, -z+2$ ; (ii)  $-x+2, y-1/2, -z+2$ ; (iii)  $x, y-1, z+1$ ; (iv)  $-x+1, y-1/2, -z+1$ ; (v)  $-x+2, y+1/2, -z+1$ ; (vi)  $-x+1, y+1/2, -z+1$ ; (vii)  $-x+2, y-1/2, -z+1$ ; (viii)  $x, y+1, z$ ; (ix)  $x+1, y, z+1$ ; (x)  $x-1, y+1, z$ ; (xi)  $-x+1, y+1/2, -z$ ; (xii)  $x, y+1, z-1$ ; (xiii)  $x, y, z-1$ ; (xiv)  $-x+2, y+3/2, -z+1$ ; (xv)  $x+1, y-1, z$ ; (xvi)  $x, y-1, z$ ; (xvii)  $-x+2, y-3/2, -z+1$ ; (xviii)  $-x+1, y-1/2, -z$ ; (xix)  $x-1, y, z-1$ ; (xx)  $x, y, z+1$ .



**Table S5.** Calculation of dipole moment for NO<sub>3</sub>, SbO<sub>2</sub>F<sub>3</sub>, SbO<sub>3</sub>F<sub>3</sub>, RbO<sub>5</sub>F<sub>3</sub>, RbO<sub>5</sub>F<sub>4</sub>, RbO<sub>7</sub>F<sub>3</sub> and RbO<sub>6</sub>F<sub>3</sub> polyhedra and net dipole moment for a unit cell in Rb<sub>2</sub>SbF<sub>3</sub>(NO<sub>3</sub>)<sub>2</sub>. (D = Debyes).

| Rb <sub>2</sub> SbF <sub>3</sub> (NO <sub>3</sub> ) <sub>2</sub> |                      |              |              |                 |
|------------------------------------------------------------------|----------------------|--------------|--------------|-----------------|
| Polar unit (a unit cell)                                         | Dipole moment (D)    |              |              |                 |
|                                                                  | x-component          | y-component  | z-component  | total magnitude |
| NO <sub>3</sub>                                                  | 0.513648436          | 0.234558814  | 0.191112285  | 0.596134598     |
|                                                                  | 0.108485631          | -0.157171827 | 0.081992262  | 0.207833699     |
|                                                                  | -0.108485631         | -0.157171827 | -0.081992262 | 0.207833699     |
|                                                                  | 0.227026782          | -0.619199226 | -0.5539297   | 0.861270546     |
|                                                                  | -0.504323787         | 0.234173996  | -0.191065945 | 0.587950795     |
|                                                                  | 0.862960812          | 0.978223436  | 2.826191867  | 3.112713113     |
|                                                                  | -0.153060783         | -0.557626404 | 0.479223504  | 0.751019291     |
|                                                                  | -0.937774147         | 1.031641798  | -2.95170051  | 3.264389844     |
| total                                                            | 0.008477313          | 0.98742876   | -0.118176237 | 0.994511        |
| SbO <sub>2</sub> F <sub>3</sub>                                  | -18.00575606         | 4.576773595  | -5.524643663 | 19.38235784     |
|                                                                  | 18.02497973          | 4.57187686   | 5.528761606  | 19.40023601     |
| total                                                            | 0.01922367           | 9.148650455  | 0.004117943  | 9.148671579     |
| SbO <sub>3</sub> F <sub>3</sub>                                  | 7.671279642          | -15.50425804 | 1.25043272   | 17.3434175      |
|                                                                  | -7.673115176         | -15.50350597 | -1.248829415 | 17.34344166     |
| total                                                            | -0.001835534         | -31.00776401 | 0.001603305  | 31.00776411     |
| RbO <sub>5</sub> F <sub>3</sub>                                  | -2.969476493         | -1.516763083 | 1.490241888  | 3.652284461     |
|                                                                  | 2.969696696          | -1.516572524 | -1.490397569 | 3.652447891     |
| total                                                            | 0.000220203          | -3.033335607 | -0.000155681 | 3.033335619     |
| RbO <sub>5</sub> F <sub>4</sub>                                  | -1.532447842         | 1.921428942  | -0.455412973 | 2.499537266     |
|                                                                  | 1.532030836          | 1.920925535  | 0.455560068  | 2.498921441     |
| total                                                            | -0.000417006         | 3.842354477  | 0.000147095  | 3.842354502     |
| RbO <sub>7</sub> F <sub>3</sub>                                  | 0.677633926          | -1.091620233 | 3.280630448  | 3.523259657     |
|                                                                  | -0.67702583          | -1.089989837 | -3.279237974 | 3.521341152     |
| total                                                            | 0.000608096          | -2.18161007  | 0.001392474  | 2.181610599     |
| RbO <sub>6</sub> F <sub>3</sub>                                  | 2.863556564          | -1.362563963 | -0.80970568  | 3.272943635     |
|                                                                  | -2.60569618          | -1.851204741 | 0.402707331  | 3.221612139     |
| total                                                            | 0.257860384          | -3.213768704 | -0.406998349 | 3.249684433     |
| Net dipole moment                                                | 0.284137             | -25.458      | -0.51807     | 25.4649         |
| Cell Volume                                                      | 919.7 Å <sup>3</sup> |              |              |                 |

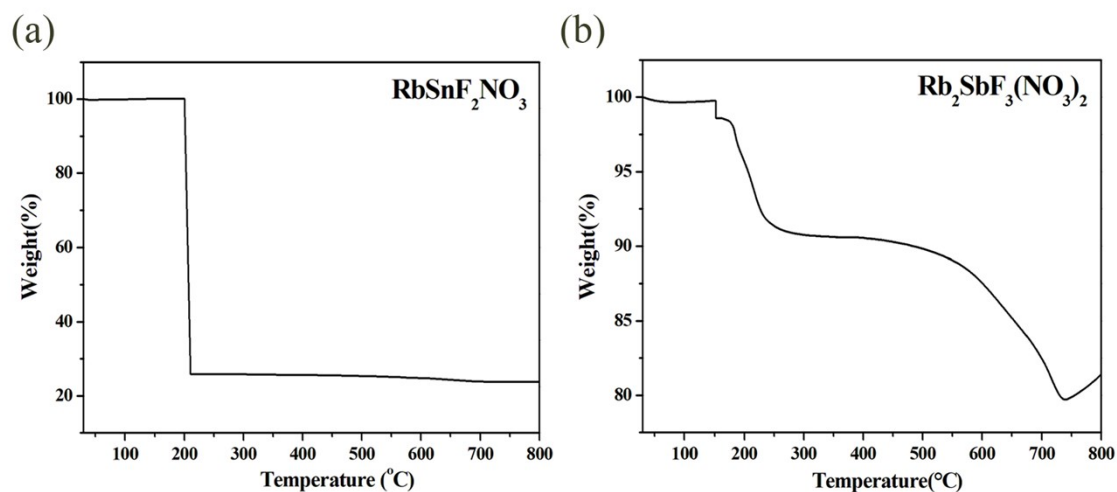

Fig. S1 TGA curves of (a)  $\text{RbSnF}_2\text{NO}_3$  and (b)  $\text{Rb}_2\text{SbF}_3(\text{NO}_3)_2$  under  $\text{N}_2$  atmosphere.

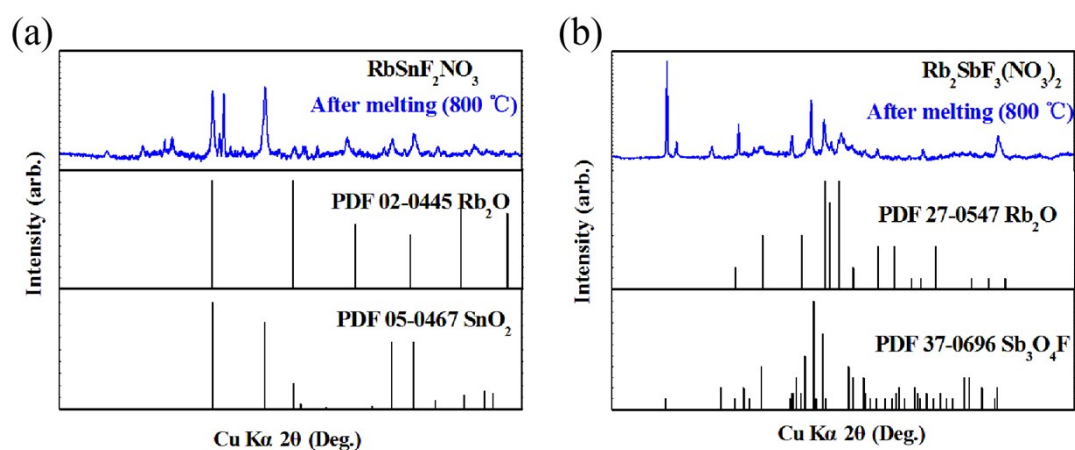

Fig. S2 XRD patterns of the residues of TGA for (a)  $\text{RbSnF}_2\text{NO}_3$  and (b)  $\text{Rb}_2\text{SbF}_3(\text{NO}_3)_2$ .

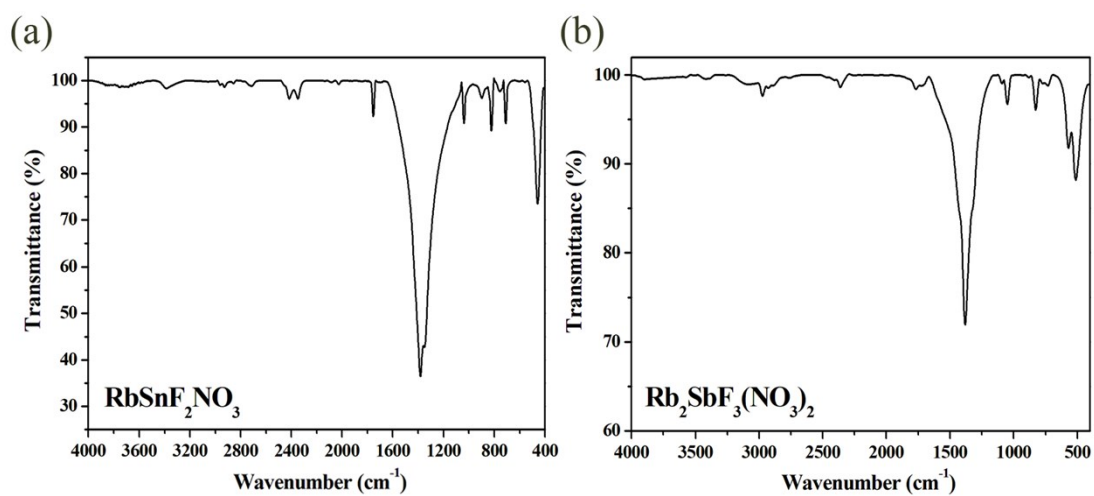

Fig. S3 The IR spectra of (a)  $\text{RbSnF}_2\text{NO}_3$  and (b)  $\text{Rb}_2\text{SbF}_3(\text{NO}_3)_2$ .

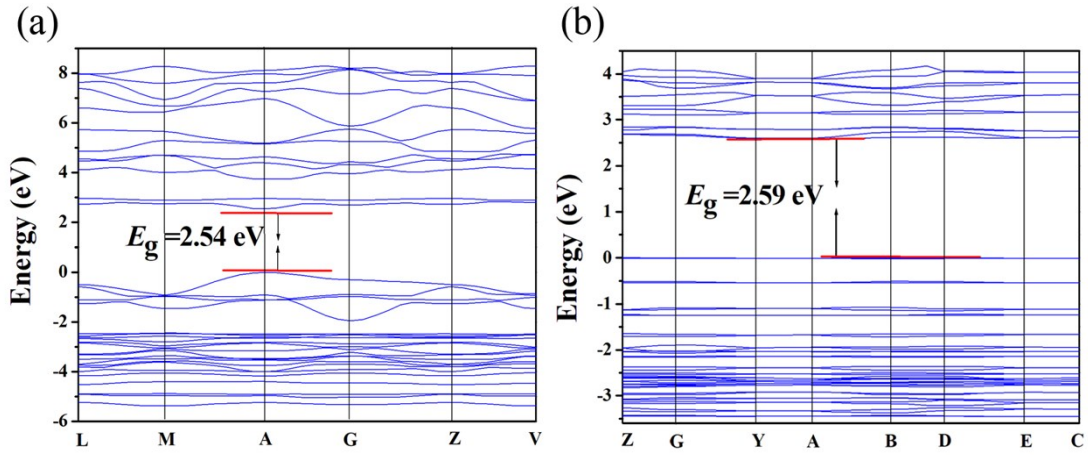

**Fig. S4** Calculated band structures of (a)  $\text{RbSnF}_2\text{NO}_3$  and (b)  $\text{Rb}_2\text{SbF}_3(\text{NO}_3)_2$ .

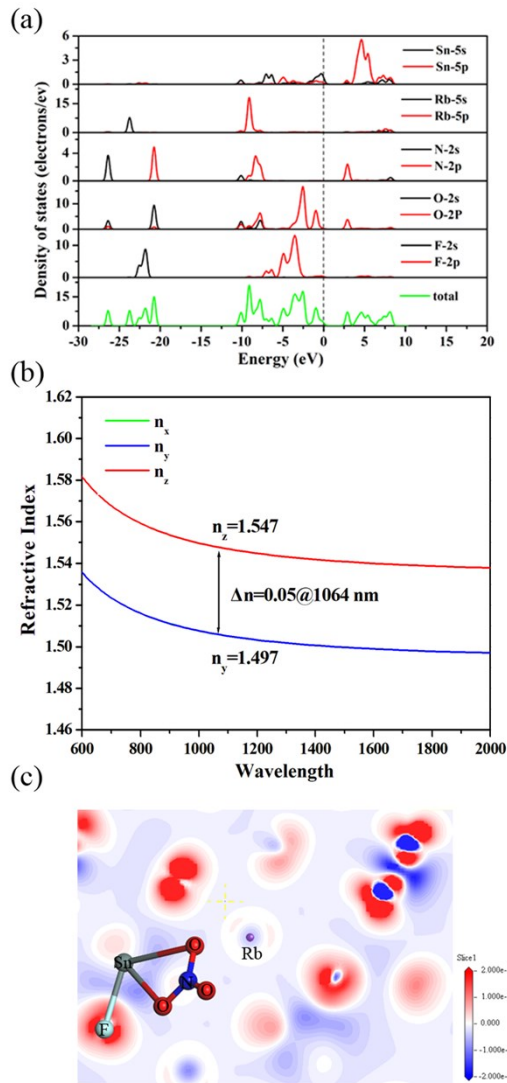

**Fig. S5** The theoretical calculations of  $\text{RbSnF}_2\text{NO}_3$ . (a) Total and partial DOS of states for  $\text{RbSnF}_2\text{NO}_3$ , the Fermi level is normalized to 0 eV; (b) the calculated birefringence curves for  $\text{RbSnF}_2\text{NO}_3$ ; (c) the electron-density difference map for  $\text{RbSnF}_2\text{NO}_3$ .

## References

- (1) Sheldrick, G.M. A short history of SHELX-2014, *Acta Crystallogr.* 2008, 64, 112-122.
- (2) Spek, A. L. Single-crystal structure validation with the program PLATON. *J. Appl. Crystallogr.* **2003**, 36, 7-13.
- (3) Kurtz, S. K.; Perry, T. T. A powder technique for the evaluation of nonlinear optical materials. *J. Appl. Phys.* **1968**, 39, 3798-3813.
- (4) Segall, M. D.; Lindan, P. J. D.; Probert, M. J. First-principles simulation: ideas, illustrations and the CASTEP code. *J. Phys. Condens. Matter.* **2002**, 14, 2717.
- (5) Perdew, J. P.; Burke, K.; Ernzerhof, M. Generalized gradient approximation made simple, *Phys. Rev. Lett.* **1996**, 77, 3865-3868.
- (6) Vanderbilt, D. Soft self-consistent pseudopotentials in a generalized eigenvalue formalism, *Phys. Rev. B.* **1990**, 41, 7892.
